# Supplementary material for: A Systematic Review and Implementation Guidelines of Multimodal Foundation Models in Medical Imaging
Source: Research Square preprint supplement (doi:10.21203/rs.3.rs-5537908/v1), 2025-04-28
Supplement: Supplementary file 1 [file 261667e44e495a67091de22c.xlsx]

## Sheet: Sheet1
	Authors	Year	Source	Medical Domain	Image Modality	Other Modalities	SSL Strategy	Imaging Modality Architecture	Modality 1 Architecture	Imaging Model Weight Initailziation	Modality Model Weight Initailziation	Human-centered Metrics	Task 1	Pretraining Dataset	Pretraining Dataset size	Task 1 Performance	Task 1 Metric	Task 1: Single Modality Performance	Task 2	Task 2 Performance	Task 2 Metric	Task 2 Single Modality Performance	Task 3	Task 3 Performance	Task 3 Metrics	Task 3 Single Modality Performance	Task 4	Task 4 Performance	Task 4 Metrics	Task 4 Single Modality Performance
Multi-Modal Understanding and Generation for Medical Images and Text via Vision-Language Pre-Training	Jong Hak Moon	2022	Peer-reviewed	Radiology	X-ray	Reports	Combined	CNN (ResNet-50)	Transformer	Imagenet	BERT	No	Classification of X-ray images	MIMIC-CXR	89,395	0.962	AUROC	N/A	Report-to-image retrieval	0.422	Recall@5	N/A	VQA	0.787	Accuracy	N/A	Radiology report Generation	0.075	BLEU	N/A
PreRadE: Pretraining Tasks on Radiology Images and Reports Evaluation Framework	Matthew Coleman	2022	Peer-reviewed	Radiology	X-ray	Reports	Combined	CNN (ResNet-101)	Transformer	Mask-RCNN	BERT	No	Classification of X-ray images	MIMIC-CXR	112,124	0.989	AUROC	0.891	N/A	N/A	N/A	N/A	N/A	N/A	N/A	N/A	N/A	N/A	N/A	N/A
Generalized radiograph representation learning via cross-supervision between images and free-text radiology reports	Hong-Yu Zhou	2023	Peer-reviewed	Radiology	X-ray	Reports	Combined	ViT	Transformer	N/A	BERT	No	Classification of X-ray images	MIMIC-CXR-JPG	217,000	0.98	AUROC	N/A	N/A	N/A	N/A	N/A	N/A	N/A	N/A	N/A	N/A	N/A	N/A	N/A
Improving Radiology Summarization with Radiograph and Anatomy Prompts	Jinpeng Hu	2023	Peer-reviewed	Radiology	X-ray	Reports	Combined	CNN (ResNet-101), Transformer	Transformer	ImageNet	BioBERT	Human Evaluation	Radiology report summarization	MIMIC-CXR	124,577	0.6787	ROUGE-L	0.4705	N/A	N/A	N/A	N/A	N/A	N/A	N/A	N/A	N/A	N/A	N/A	N/A
Multi-task Paired Masking with Alignment Modeling for Medical Vision-Language Pre-training	Ke Zhang	2023	Peer-reviewed	Radiology	X-ray	Reports	Combined	ViT (B/16)	Transformer	CLIP	CXR-BERT	No	Classification of X-ray images	MIMIC, ROCO	368,960 / 65,460	0.906	AUROC	N/A	Pneumonia classification	0.941	AUROC	N/A	Report generation from X-ray	0.388	ROUGE-L	N/A	VQA	0.776	Accuracy	N/A
Masked Vision and Language Pre-training with Unimodal and Multimodal Contrastive Losses for Medical Visual Question Answering	Pengfei Li	2023	Peer-reviewed	Many	Many	VQA	Combined	ViT (B/16)	Transformer	N/A	BERT	No	VQA for radiology	ROCO, MedICaT, ImageCLEF	80,000 / 217,000 / 90,000	0.849	Accuracy	N/A	N/A	N/A	N/A	N/A	N/A	N/A	N/A	N/A	N/A	N/A	N/A	N/A
Self-supervised multi-modal training from uncurated images and reports enables monitoring AI in radiology	Sangjoon Park	2023	Peer-reviewed	Radiology	CT	Reports	Combined	ViT (B/16)	Transformer	DINO (MIMIC)	CXRBERT	Direct Comparison to Human Performance	Error correction in reports	MIMIC-CXR	371,951	0.855	AUROC	N/A	Zero-shot abnormality detection	0.881	AUROC	N/A	Zero-shot unseen abnormality detection	0.8	AUROC	N/A	N/A	N/A	N/A	N/A
Merlin: A Vision Language Foundation Model for 3D Computed Tomography	Louis Blankemeier	2024	ArXiv	Radiology	CT	Reports, ICD Codes	Combined	CNN (ResNet-152)	Transformer	ImageNet	Longformer	No	Radiology report generation	Private Dataset	15,331	262	ROUGE-2	N/A	Multi-disease 5-year prediction	0.76	Accuracy	N/A	Zero-shot classification	0.767	F1	N/A	Phenotype classification	0.812	AUROC	N/A
Self-Supervised Contrastive Video-Speech Representation Learning for Ultrasound	Jianbo Jiao	2020	Peer-reviewed	Radiology	Ultrasound	Audio	Contrastive	CNN (ResNeXt-50)	CNN (ResNeXt-50)	N/A	N/A	No	Gaze prediction	Look, Listen and Ĺearn	81	0.95	AUROC	0.91	Standard plane detection	0.726	F1	N/A	N/A	N/A	N/A	N/A	N/A	N/A	N/A	N/A
Retrieval-Based Chest X-Ray Report Generation Using a Pre-trained Contrastive Language-Image Model	Mark Endo	2021	Peer-reviewed	Radiology	X-ray	Reports	Contrastive	ViT	Transformer	CLIP	CLIP	No	Report generation	MIMIC-CXR	377,110	0.069	BLEU2	0.092	Classification of X-ray images (based on report)	0.352	F1	0.246	N/A	N/A	N/A	N/A	N/A	N/A	N/A	N/A
CMIM: Cross-modal information maximization for medical imaging	Tristan Sylvain	2021	Peer-reviewed	Radiology	X-ray	Reports	Contrastive	CNN (ResNet-50)	LSTM (GLoVe embedding)	N/A	N/A	No	Classification of X-ray images	Open-i	3,643	0.793	AUROC	0.785	Segmentation	N/A	N/A	N/A	N/A	N/A	N/A	N/A	N/A	N/A	N/A	N/A
Improving Joint Learning of Chest X-Ray and Radiology Report by Word Region Alignment	Zhanghexuan Ji	2021	Peer-reviewed	Radiology	X-ray	Reports	Contrastive	CNN	Transformer	N/A	N/A	No	Classification of X-ray images	MIMIC-CXR	217,252	0.915	AUROC	0.893	N/A	N/A	N/A	N/A	N/A	N/A	N/A	N/A	N/A	N/A	N/A	N/A
Multimodal Contrastive Learning for Prospective Personalized Estimation of CT Organ Dose	Abdullah-Al-Zubaer Imran	2022	Peer-reviewed	Radiology	CT	Patient Size Profile	Contrastive	CNN (ResNet-18)	CNN (1D-convolution)	N/A	N/A	No	CT dose estimation	Private Dataset	130	2.267	RMSE	N/A	N/A	N/A	N/A	N/A	N/A	N/A	N/A	N/A	N/A	N/A	N/A	N/A
ContIG: Self-supervised Multimodal Contrastive Learning for Medical Imaging with Genetics	Aiham Taleb	2022	Peer-reviewed	Optomology	Fundus Image	Genetics	Contrastive	CNN (ResNet-50)	FCNN	N/A	N/A	No	Diabetic Retinopathy Detection	UK Biobank	155,238	0.8593	QwKappa	0.8183	Retinal fundus disease classification	0.9362	AUROC	0.92	Pathological Myopia Segmentation	0.7847	Dice	0.7725	Cardiovascular Risk Prediction	0.7272	AUROC	0.6195
Making the Most of Text Semantics to Improve Biomedical Vision–Language Processing	Benedikt Boecking	2022	Peer-reviewed	Radiology	X-ray	Reports	Contrastive	CNN (ResNet-50)	Transformer	SimCLR (MIMIC)	CXR-BERT	No	Pneumonia Classification	MIMIC-CXR	371,951	0.891	AUROC	0.849	Pneumonia segmentation	0.614	Dice	0.57	N/A	N/A	N/A	N/A	N/A	N/A	N/A	N/A
Multi-Granularity Cross-modal Alignment for Generalized Medical Visual Representation Learning	Fuying Wang	2022	Peer-reviewed	Radiology	X-ray	Reports	Contrastive	ViT	Transformer	N/A	BioClinicalBERT	No	Classification of X-ray images	MIMIC-CXR	217,252	0.908	AUROC	0.763	Object detection	0.249	mAP	0.157	Segmentation	0.698	Dice	0.64	N/A	N/A	N/A	N/A
A multimodal approach to automated generation of radiology reports using contrastive learning	Giorgio Leonardi	2022	Peer-reviewed	Radiology	X-ray	Reports	Contrastive	CNN	Transformer	CheXNet	BERT	No	Distance between real and generated report in latent space	Open-i	3,081	0.21045	L2	N/A	N/A	N/A	N/A	N/A	N/A	N/A	N/A	N/A	N/A	N/A	N/A	N/A
Contrastive Cross-Modal Pre-Training: A General Strategy for Small Sample Medical Imaging	Gongbo Liang	2022	Peer-reviewed	Radiology	X-ray	Reports	Contrastive	CNN	Transformer	N/A	BERT	No	Classification of X-ray images	MIMIC-CXR	368,948	N/A	N/A	N/A	N/A	N/A	N/A	N/A	N/A	N/A	N/A	N/A	N/A	N/A	N/A	N/A
Contrastive Learning of Medical Visual Representations from Paired Images and Text	Yuhao Zhang	2022	ArXiv	Radiology	X-ray	Reports	Contrastive	CNN (ResNet-50)	Transformer	N/A	BERT	No	Classification of X-ray images	MIMIC-CXR	217,000	0.927	AUROC	0.908	Image-to-image retrieval	0.45	Precision@5	0.148	Image-to-text retrieval	0.6	Precision@5	0.125	N/A	N/A	N/A	N/A
Joint Representation Learning from French Radiological Reports and Ultrasound Images	Hind Dadoun	2023	Peer-reviewed	Radiology	Ultrasound	Reports	Contrastive	CNN (ResNet-50)	Transformer	N/A	CamemBERT	No	Kidney abormalities	Private Dataset	6,960	0.79	F1	0.69	N/A	N/A	N/A	N/A	N/A	N/A	N/A	N/A	N/A	N/A	N/A	N/A
DeAF: A multimodal deep learning framework for disease prediction	Kangshun Li	2023	Peer-reviewed	Radiology	CT and MRI	Clinical Data	Contrastive	CNN	FC	N/A	N/A	No	Postoperative efficacy of CRS for colorectal cancer	Private colorectal cancer dataset, ANDI	185 / 1,675	0.6186	Accuracy	0.34	MCI patients change to Alzheimer’s disease	0.6997	Accuracy	0.578	N/A	N/A	N/A	N/A	N/A	N/A	N/A	N/A
Cross Modal Global Local Representation Learning from Radiology Reports and X-Ray Chest Images	Nathan Hadjiyski	2023	Peer-reviewed	Radiology	X-ray	Reports	Contrastive	CNN	Transformer	ImageNet	BioClinicalBERT	No	Classification of X-ray images (5 classes)	CheXpert, CheXphoto, IU-RR	191,027 / 10,507 / 2,552	0.868	AUROC	N/A	N/A	N/A	N/A	N/A	N/A	N/A	N/A	N/A	N/A	N/A	N/A	N/A
Self-Supervised Learning with Radiology Reports, A Comparative Analysis of Strategies for Large Vessel Occlusion and Brain CTA Images	Samiksha Pachade	2023	Peer-reviewed	Radiology	X-ray	Reports	Contrastive	CNN (3D ResNet-18)	Transformer (DistilBERT)	No	DistilBERT	No	Large vessel occlusion detection	Private Dataset	1,542	0.8	AUROC	0.73	N/A	N/A	N/A	N/A	N/A	N/A	N/A	N/A	N/A	N/A	N/A	N/A
Large-Scale Domain-Specific Pretraining for Biomedical Vision-Language Processing	Sheng Zhang	2023	ArXiv	Many	Many	Pubmed Image Captions	Contrastive	ViT (B/16)	Transformer	N/A	PubMedBERT	No	Image-to-text retrieval	PMC-15M	15,000,000	0.8934	Recall@1	N/A	Text-to-image retrieval	0.8844	Recall@1	N/A	N/A	N/A	N/A	N/A	N/A	N/A	N/A	N/A
GLoRIA: A Multimodal Global-Local Representation Learning Framework for Label-efficient Medical Image Recognition	Shih-Cheng Huang	2023	Peer-reviewed	Radiology	X-ray	Reports	Contrastive	CNN	Transformer	ImageNet	BioClinicalBERT	No	Classification of X-ray images	CheXpert	186,229	0.886	AUROC	0.814	Retrieval	0.6924	Precision@5	N/A	Segmentation	0.634	Dice	0.635	N/A	N/A	N/A	N/A
Learning to Exploit Temporal Structure for Biomedical Vision–Language Processing	Shruthi Bannur	2023	ArXiv	Radiology	X-ray	Reports	Contrastive	CNN, Transformer	Transformer (CXR-BERT)	BioViL	CXR-BERT	No	Report generation	MIMIC-CXR	174,100	0.3586	CHEXBERT	N/A	Classification of X-ray images	0.89	AUROC	N/A	N/A	N/A	N/A	N/A	N/A	N/A	N/A	N/A
Multimodal contrastive learning for radiology report generation	Xing Wu	2023	Peer-reviewed	Radiology	X-ray	Reports	Contrastive	CNN (ResNet-50)	Transformer	N/A	N/A	No	Report generation	MIMIC-CXR, Open-i	368,948 / 5,226	0.369	ROUGE	N/A	N/A	N/A	N/A	N/A	N/A	N/A	N/A	N/A	N/A	N/A	N/A	N/A
A visual–language foundation model for pathology image analysis using medical Twitter	Zhi Huang	2023	Peer-reviewed	Pathology	Pathology Slides	Text from Twitter Posts	Contrastive	ViT (B/32)	Transformer	N/A	N/A	No	Classification of pathology slices	OpenPath, PathLAION	208,414	0.927	F1	N/A	Image retrieval	0.646	Recall@10		N/A	N/A	N/A	N/A	N/A	N/A	N/A	N/A
Relaxing Contrastiveness in Multimodal Representation Learning	Zudi Lin	2023	Peer-reviewed	Radiology	X-ray	Reports	Contrastive	CNN (ResNet-50)	Transformer	Imagenet	ClinicalBERT	No	Image-image retrieval	MIMIC-CXR	217,252	0.456	precision@5	0.148	Text-to-image retrieval	0.674	Precision@5	0.125	Classification of X-ray images	0.8858	AUROC	0.8737	N/A	N/A	N/A	N/A
Improved Disease Classification in Chest X-Rays with Transferred Features from Report Generation	Yuan Xue	2019	Peer-reviewed	Radiology	X-ray	Reports	Generative	CNN	RNN	ImageNet	N/A	No	Classification of X-ray images	IU X-ray	3,331 / 3,955	0.842	AUROC	0.837	N/A	N/A	N/A	N/A	N/A	N/A	N/A	N/A	N/A	N/A	N/A	N/A
Classification of femur fracture in pelvic X-ray images using meta-learned deep neural network	Changhwan Lee	2020	Peer-reviewed	Radiology	X-ray	Reports	Generative	CNN (Inception v3)	LSTM (GLoVe embedding)	N/A	N/A	No	Classification of femur fracture	Private Dataset	459	0.845	F1	0.792	N/A	N/A	N/A	N/A	N/A	N/A	N/A	N/A	N/A	N/A	N/A	N/A
Radiology Report Generation for Rare Diseases via Few-shot Transformer	Xing Jia	2021	Peer-reviewed	Radiology	X-ray	Reports	Generative	CNN (ResNet-101)	Transformer	N/A	N/A	No	Radiologi report generation	MIMIC-CXR, Open-i	368,960 / 5,973	0.367	ROUGE-L	N/A	X-ray classification	0.8193	AUROC	0.8039	N/A	N/A	N/A	N/A	N/A	N/A	N/A	N/A
RadTex: Learning Efficient Radiograph Representations from Text Reports	Keegan Quigley	2022	Peer-reviewed	Radiology	X-ray	Reports	Generative	CNN (ResNet-50)	Transformer	N/A	SciBERT	No	Classification of X-ray images	MIMIC-CXR	247,425	0.785	AUROC	0.801	N/A	N/A	N/A	N/A	N/A	N/A	N/A	N/A	N/A	N/A	N/A	N/A
RoentGen: Vision-Language Foundation Model for Chest X-ray Generation	Pierre Chambon	2022	ArXiv	Radiology	X-ray	Reports	Generative	CNN (UNet)	Transformer	Stable Diffusion	CLIP	Human Evaluation	Classification of X-ray images	MIMIC-CXR	324,315	0.84	AUROC	N/A	N/A	N/A	N/A	N/A	N/A	N/A	N/A	N/A	N/A	N/A	N/A	N/A
Adapting Pretrained Vision-Language Foundational Models to Medical Imaging Domains	Pierre Chambon	2022	ArXiv	Radiology	X-ray	Reports	Generative	CNN (UNet)	Transformer	Stable Diffusion	CLIP	Human Evaluation	Classification of pleural Effusion	LAION-5B	1,000,000	0.984	AUROC	N/A	N/A	N/A	N/A	N/A	N/A	N/A	N/A	N/A	N/A	N/A	N/A	N/A
Counterfactual Biomedical Image Generation by Instruction-Learning from Multimodal Patient Journeys	Yu Gu	2023	ArXiv	Radiology	X-ray	Reports	Generative	ViT	Transformer	BiomedCLIP	BiomedCLIP	No	Classification of pathology on counterfactual image	MIMIC-CXR	157,148	0.805	Accuracy	N/A	Classification of age on counterfactual image	0.972	Accuracy		Classification of race on counterfactual image	0.794	Accuracy	N/A	N/A	N/A	N/A	N/A
KU-DMIS-MSRA at RadSum23: Pre-trained Vision-Language Model for Radiology Report Summarization	Gangwoo Kim	2023	Peer-reviewed	Radiology	X-ray	Reports, Prompts	Generative VLM	CNN (ResNet)	Transformer	N/A	N/A	No	Radiology report summarization	MIMIC-CXR	125,417	0.4775	ROUGE	0.463	N/A	N/A	N/A	N/A	N/A	N/A	N/A	N/A	N/A	N/A	N/A	N/A
CheXagent: Towards a Foundation Model for Chest X-Ray Interpretation	Zhihong Chen	2024	ArXiv	Radiology	X-ray	Reports	Generative VLM	ViT (G/14)	Transformer	EVA-CLIP-g	Mistral-7B-v0.1	Human Evaluation	View classification	CheXinstruct	6,100,000	0.975	Accuracy	N/A	Disease Identification	0.556	Accuracy		VQA	0.781	Accuracy	N/A	Image-Text Reasoning	0.59	Accuracy	N/A
Towards a clinically accessible radiology foundation model: open-access and lightweight, with automated evaluation	Juan Manuel Zambrano Chaves	2024	ArXiv	Radiology	X-ray	Reports	Generative VLM	ViT (B/14)	Transformer	Biomed-CLIP	Vicuna-7B-v1.5	Human-Driven Metrics	Radiology report generation	CXR-697K	697,435	0.306	ROUGE-L	N/A	N/A	N/A	N/A	N/A	N/A	N/A	N/A	N/A	N/A	N/A	N/A	N/A
Capabilities of Gemini Models in Medicine	Khaled Saab	2024	ArXiv	Many	Many	VQA	Generative VLM	ViT	Transformer	Gemini-L	Gemini-L	Human Preference and Performance Evaluation	Multiple-choice medical exam questions	MultiMedBench	714,097	0.911	Accuracy	N/A	Multimodal multiple-choice medical questions	0.935	Accuracy	N/A	EHR Needle-in-a-Haystack	0.77	F1	N/A	N/A	N/A	N/A	N/A
Towards Generalist Biomedical AI	Tao Tu	2024	Peer-reviewed	Many	Many	VQA	Generative VLM	ViT	Transformer (PaLM)	PaLM-E	PaLM-E	Human Preference and Performance Evaluation	VQA radiology	MultiMedBench	714,097	0.8928	F1	N/A	Report generation on chest X-rays	0.2749	ROUGE-L	N/A	Classification of dermatology images	0.9727	AUROC	N/A	N/A	N/A	N/A	N/A
LLaVA-Med: Training a Large Language-and-Vision Assistant for Biomedicine in One Day	Chunyuan Li	2023	ArXiv	Many	Many	Pubmed Image Captions	Generative VLM	ViT	Transformer (LLAVA)	CLIP	LLAVA	Human-Driven Metrics	Medical QA	PMC-15M	15,000,000	0.551	GPT-4 evaluation	N/A	N/A	N/A	N/A	N/A	N/A	N/A	N/A	N/A	N/A	N/A	N/A	N/A
Med-Flamingo: a Multimodal Medical Few-shot Learner	Michael Moor	2023	ArXiv	Many	Many	Text From Medical Publications and Books	Generative VLM	ViT (L/14)	Transformer (Llama)	OpenFlamingo	OpenFlamingo	Human Evaluation	VQA radiology	MTB, PMC-OA	800,000 / 1,300,000	5.61	Clinical eval. score	N/A	VQA for pathology	2.08	Clinical eval. score	N/A	VQA	4.33	Clinical eval. score	N/A	N/A	N/A	N/A	N/A
A Generalist Learner for Multifaceted Medical Image Interpretation	Hong-Yu Zhou	2024	ArXiv	Many	Many	Medical Text	Generative VLM	Swin Transformer	Transformer	ImageNet	Llama-2-Chat	Direct Comparison to Human Performance	Radiology report generation	MedInterp	13,000,000	0.16	BLEU-4	N/A	Classification of X-rays	0.734	F1	N/A	Detection on chest X-rays	0.239	IOU		Segmentation	0.9555	DICE	N/A
MAIRA-2: Grounded Radiology Report Generation	Shruthi Bannur	2024	ArXiv	Radiology	X-ray	Reports	Generative VLM	ViT	Transformer	RAD-DINO	LLaVA-1.5	Human Evaluation	Radiology report generation	MIMIC-CXR, Pad-Chest, USMix	158,555 / 85,598 / 193,652	0.289	ROUGE-L	N/A	N/A	N/A	N/A	N/A	N/A	N/A	N/A	N/A	N/A	N/A	N/A	N/A
MAIRA-1: A specialised large multimodal model for radiology report generation	Stephanie Hyland	2024	ArXiv	Radiology	X-ray	Reports	Generative VLM	ViT	Transformer	RAD-DINO	LLaVA-2	Human-Driven Metrics	Radiology report generation	MIMIC-CXR	146,909	0.594	ROUGE-L	N/A	Phrase grounding	0.862	Recall	N/A	N/A	N/A	N/A	N/A	N/A	N/A	N/A	N/A
MMBERT: Multimodal BERT pretraining for improved medical VQA	Yash Khare	2021	Peer-reviewed	Many	Many	VQA	Self-prediction	CNN (ResNet-152)	Transformer	N/A	BERT	No	VQA	ROCO	81,000	69	BLEU	N/A	N/A	N/A	N/A	N/A	N/A	N/A	N/A	N/A	N/A	N/A	N/A	N/A
Mapping medical image-text to a joint space via masked modeling	Zhihong Chen	2023	Peer-reviewed	Radiology	CT and X-ray	Reports	Self-prediction	ViT (B/16)	Transformer	CLIP	RoBERTa	No	VQA	ROCO, MeDICAT	52,650 / 215,000	0.7987	Accuracy	N/A	Medical image and text classification (MELINDA)	0.785	Accuracy	0.6384	Classification of X-ray images	0.8887	AUROC	0.814	Image-to-text retrieval	0.22	Recall@1	N/A
